# Supplementary material for: Anaerobic membrane gas extraction facilitates thermophilic hydrogen production fromClostridium thermocellum
Source: Royal Society of Chemistry journal article supplement (doi:10.1039/c8ew00289d), 2018-01-01
Supplement: c8ew00289d1.pdf [file c8ew00289d1.pdf]

**Pages: 5 Figures: 4; Table: 1**

**Supporting Information**

**Anaerobic membrane gas extraction facilitates thermophilic hydrogen  
production from *Clostridium thermocellum***

**Scott Singer<sup>1</sup>, Lauren Magnusson<sup>2</sup>, Dianxun Hou<sup>1</sup>, Jonathan Lo<sup>2</sup>, Pin-Ching Maness<sup>2\*</sup> and Zhiyong Jason**

**Ren<sup>1,3\*</sup>**

<sup>1</sup>Department of Civil, Environmental, and Architectural Engineering, University of Colorado  
Boulder, Boulder, Colorado 80309, United States

<sup>2</sup> National Renewable Energy Laboratory, Biosciences Center, Golden, Colorado 80401, United  
States

<sup>3</sup>Department of Civil and Environmental Engineering, Princeton University, Princeton, New  
Jersey, 08544, United States

**\*Corresponding Authors**

National Renewable Energy Laboratory, Biosciences Center, Golden, Colorado 80401, United States  
Phone: 303-384-6114, Email: [PinChing.Maness@nrel.gov](mailto:PinChing.Maness@nrel.gov)

UCB 607, SEEC S291B, University of Colorado, Boulder, CO 80309

Phone: 303-492-4137, Email: [zhiyong.ren@colorado.edu](mailto:zhiyong.ren@colorado.edu)

23

24

25

26

27

28 **Supplemental Figures**

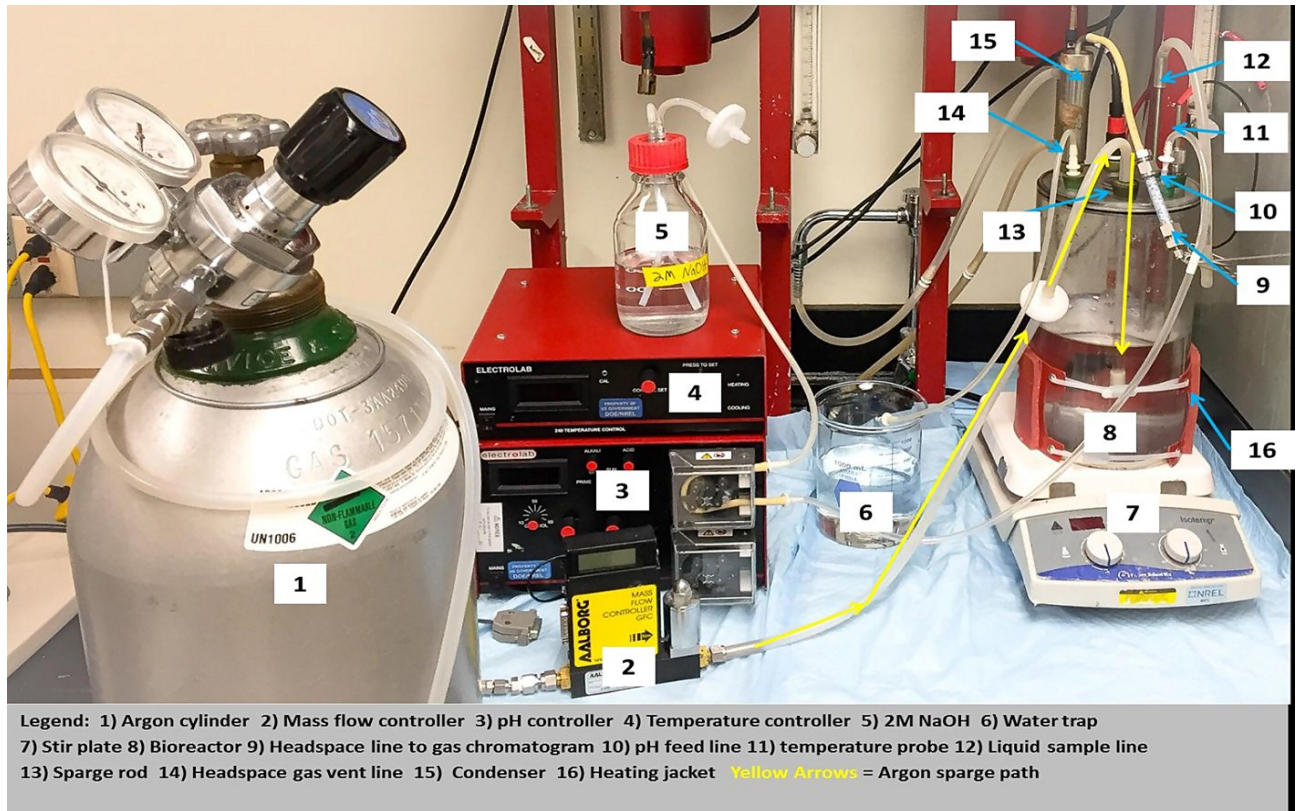

29

30 **Figure S1:** Fermentation setup for the AF.

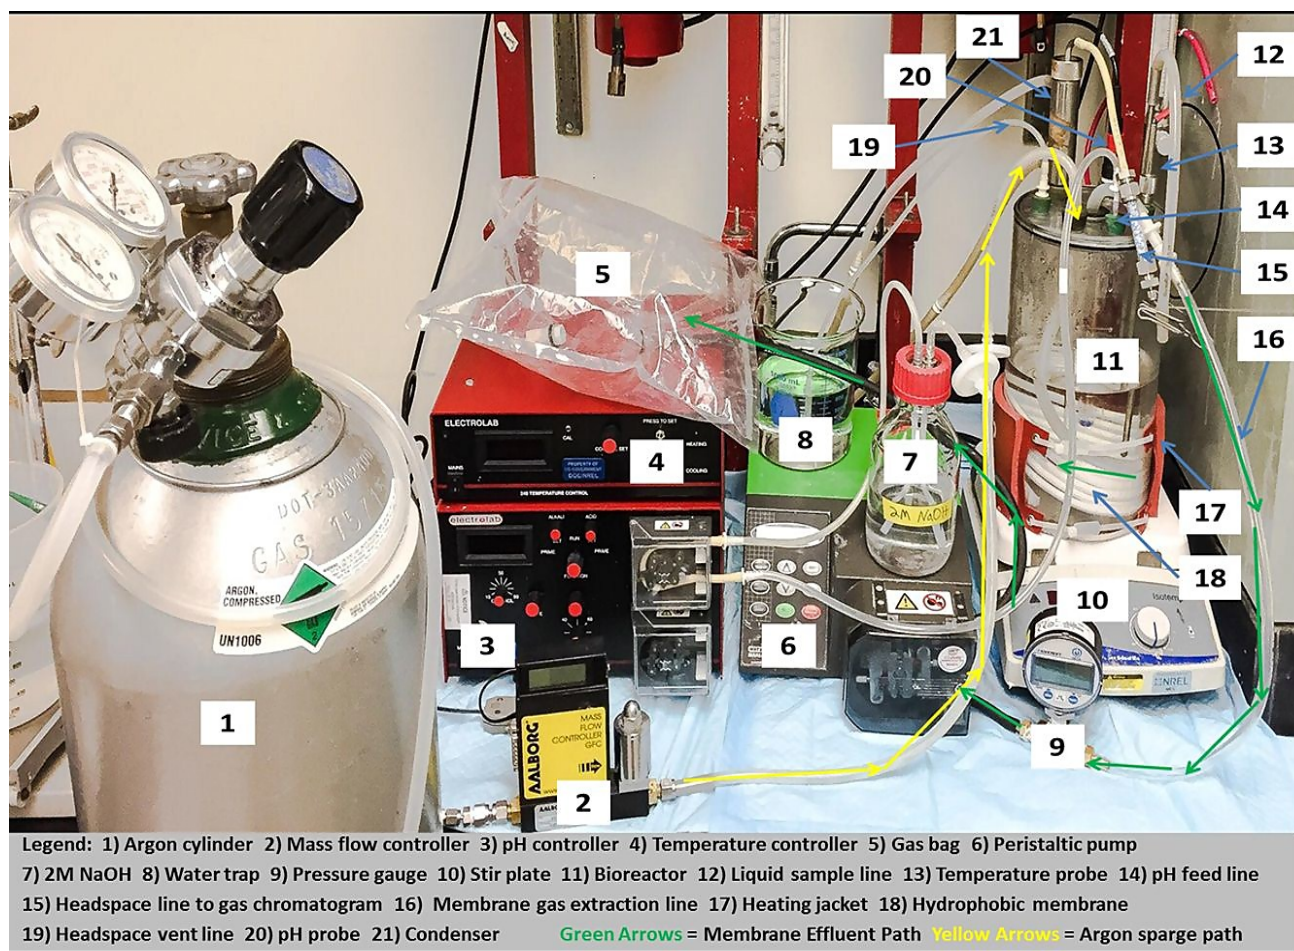

**Figure S2:** Fermentation setup for the AnMBR.

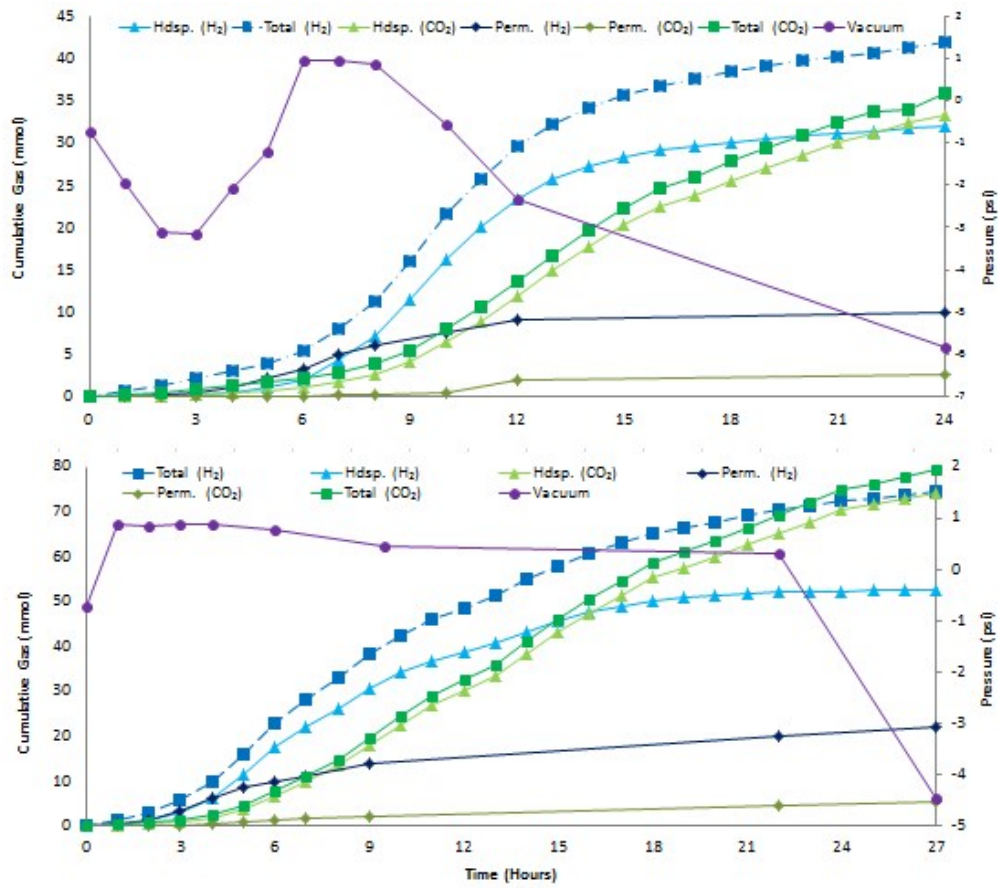

**Figure S3:** Cumulative AnMBR gas production and vacuum pressure vs. time on (A) Cellobiose (B) and on Avicel.



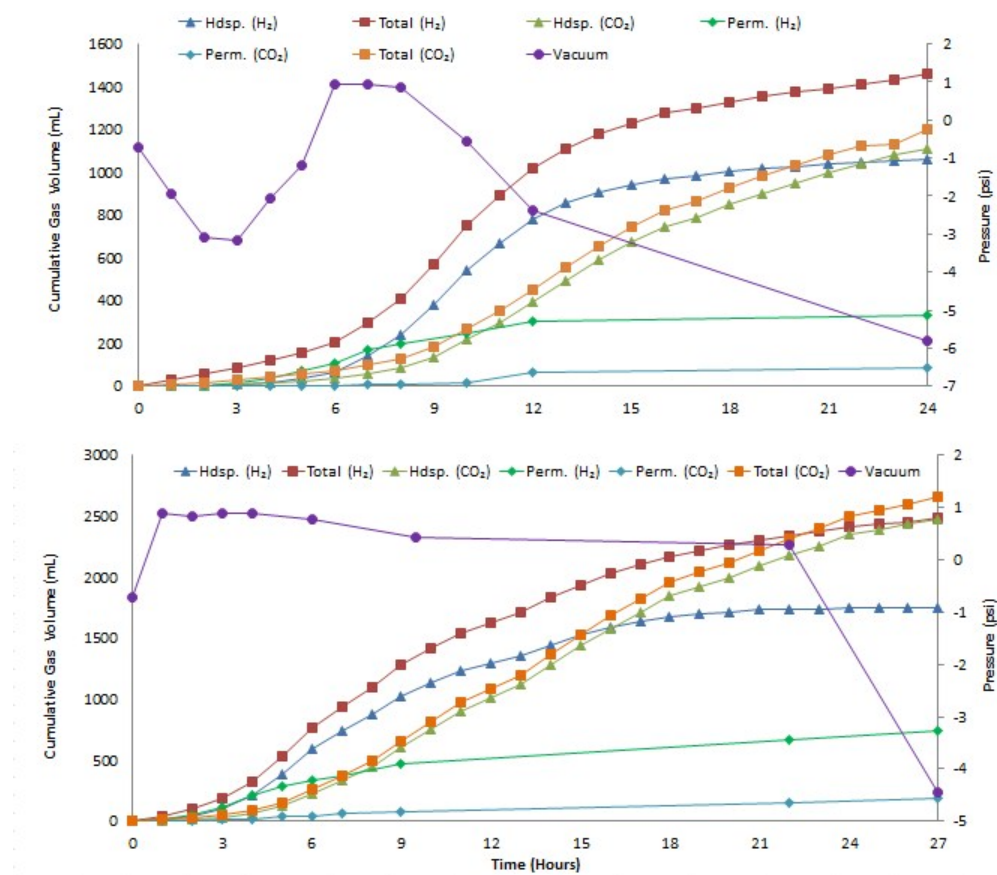

**Figure S4:** Cumulative volumetric AnMBR gas production and vacuum pressure vs. time on (A) Cellobiose (B) and on Avicel.

**Table S1.** Comparison of theoretically estimated and experimentally measured H<sub>2</sub> yields.

| Substrate | Reactor Mode | H <sub>2</sub> Yield   | Substrate | Reactor Mode | H <sub>2</sub> Yield   |
|-----------|--------------|------------------------|-----------|--------------|------------------------|
|           |              | (mmol H <sub>2</sub> / |           |              | (mmol H <sub>2</sub> / |

| mmol Hexose)          |    |                  |            | mmol Hexose)          |       |                  |            |
|-----------------------|----|------------------|------------|-----------------------|-------|------------------|------------|
| Cellobiose<br>(5 g/L) | AF | Theoretical      | 0.66       | Cellobiose<br>(5 g/L) | AnMBR | Theoretical      | 0.70       |
|                       | AF | Measured         | 0.43 ± 13% |                       | AnMBR | Measured         | 0.68 ± 30% |
|                       |    | % of Theoretical | 65% ± 13%  |                       |       | % of Theoretical | 97% ± 30%  |
|                       |    |                  |            |                       |       |                  |            |
| Avicel<br>(5 g/L)     | AF | Theoretical      | 1.23       | Avicel<br>(5 g/L)     | AnMBR | Theoretical      | 1.84       |
|                       | AF | Measured         | 0.76 ± 3%  |                       | AnMBR | Measured         | 1.21 ± 13% |
|                       |    | % of Theoretical | 62% ± 3%   |                       |       | % of Theoretical | 66% ± 13%  |

64

65
